# Supplementary material
Source: publisher site journal article supplement (https://www.dovepress.com/article/288289)
Supplement: Supplementary file 1 [file get_supplementary_file.php]

**Supplemental data**

**Table S1. List of the several significantly differential microbiota in phylum level**

| Phylum | HW/H2O | p_value | HW+OXA/H2O+OXA | p_value |
| --- | --- | --- | --- | --- |
| Actinobacteria | 1.602 | <0.05 | 0.462 | <0.05 |
| Bacteroidetes | 0.740 | <0.05 | 0.696 | <0.05 |
| Firmicutes | 1.579 | <0.05 | 1.602 | <0.05 |
| Proteobacteria | 0.700 | <0.05 | 1.716 | <0.05 |
| Tenericutes | 6.083 | <0.05 | 1.602 | <0.05 |
| Verrucomicrobia | 0.224 | <0.05 | 2.566 | <0.05 |
| Cyanobacteria | 0.558 | <0.05 | 1.808 | <0.05 |
| Deferribacteres | 104.667 | <0.05 | 0.451 | <0.05 |

**Table S2. List of the several significantly differential microbiota in Family level**

| Family | HW/H2O | p_value | HW+OXA/H2O+OXA | p_value |
| --- | --- | --- | --- | --- |
| Bacteroidaceae | 0.557 | <0.05 | 1.913 | <0.05 |
| Bifidobacteriaceae | 0.278 | <0.05 | 0.434 | <0.05 |
| Erysipelotrichaceae | 0.424 | <0.05 | 0.754 | <0.05 |
| Lachnospiraceae | 1.761 | <0.05 | 1.810 | <0.05 |
| Lactobacillaceae | 1.611 | <0.05 | 1.934 | <0.05 |
| Ruminococcaceae | 2.618 | <0.05 | 1.509 | <0.05 |

**Table S3. List of the several significantly differential microbiota in Genus level**

| Genus | HW/H2O | p_value | HW+OXA/H2O+OXA | p_value |
| --- | --- | --- | --- | --- |
| Bacteroides | 0.557 | <0.05 | 1.913 | <0.05 |
| Bifidobacterium | 0.278 | <0.05 | 0.434 | <0.05 |
| Faecalibacterium | 44.833 | <0.05 | 2.983 | <0.05 |
| Lactobacillus | 1.511 | <0.05 | 1.634 | <0.05 |
| Odoribacter | 4.583 | <0.05 | 0.692 | <0.05 |
| Roseburia | 2.122 | <0.05 | 1.566 | <0.05 |
| Turicibacter | 6.585 | <0.05 | 0.622 | <0.05 |
